# Supplementary material for: A Functionalized Polysaccharide from Sphingomonas sp. HL-1 for High-Performance Flocculation
Source: MDPI journal article supplement (doi:10.3390/polym15010056), 2022-12-23
Supplement: s1 [file s1]

# A Functionalized Polysaccharide from *Sphingomonas* sp. HL-1 for High-Performance Flocculation

Haolin Huang <sup>1</sup>, Jingsong Li <sup>1</sup>, Weiyi Tao <sup>2</sup> and Shuang Li <sup>1,\*</sup>

<sup>1</sup> College of Biotechnology and Pharmaceutical Engineering, Nanjing Tech University, Nanjing 211816, China

<sup>2</sup> College of Food Science and Light Industry, Nanjing Tech University, Nanjing 211816, China

\* Correspondence: lishuang@njtech.edu.cn; Tel./Fax: +86-25-58139942

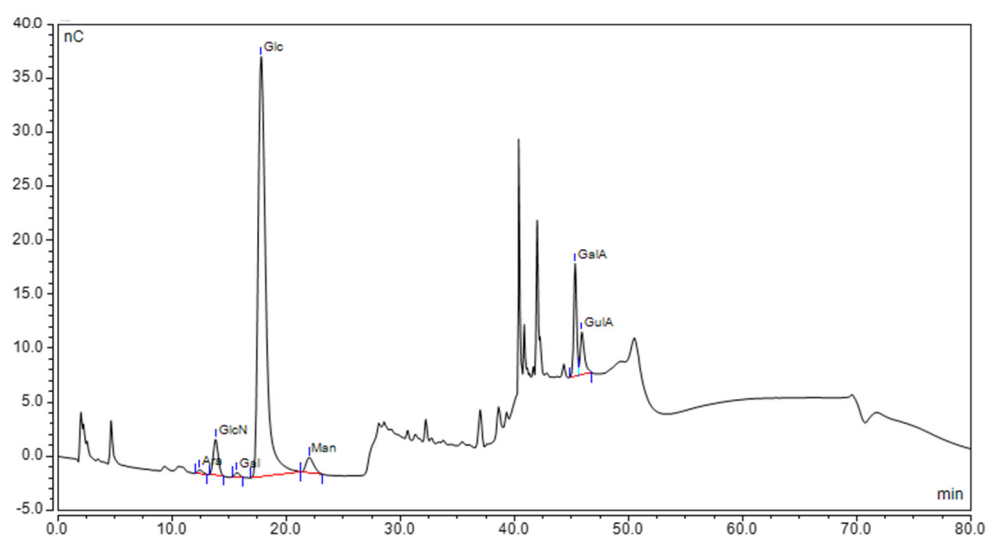

**Figure S1.** The monosaccharide composition analysis of HL1-PS.
